# Supplementary material
Source: MDPI journal article supplement (https://www.mdpi.com/2073-4352/2/4/1366)
Supplement: s1 [file s1]

 
data_cd 
 
_audit_creation_method            SHELXL-97 
_chemical_name_systematic 
; 
 ? 
; 
_chemical_name_common             ? 
_chemical_melting_point           ? 
_chemical_formula_moiety          'C38 H42 Cd F4 N8 O6, H2O' 
_chemical_formula_sum             'C38 H44 Cd F4 N8 O7' 
_chemical_formula_weight          913.21 
 
loop_ 
 _atom_type_symbol 
 _atom_type_description 
 _atom_type_scat_dispersion_real 
 _atom_type_scat_dispersion_imag 
 _atom_type_scat_source 
 'C'  'C'   0.0033   0.0016 
 'International Tables Vol C Tables 4.2.6.8 and 6.1.1.4' 
 'H'  'H'   0.0000   0.0000 
 'International Tables Vol C Tables 4.2.6.8 and 6.1.1.4' 
 'O'  'O'   0.0106   0.0060 
 'International Tables Vol C Tables 4.2.6.8 and 6.1.1.4' 
 'N'  'N'   0.0061   0.0033 
 'International Tables Vol C Tables 4.2.6.8 and 6.1.1.4' 
 'Cd'  'Cd'  -0.8075   1.2024 
 'International Tables Vol C Tables 4.2.6.8 and 6.1.1.4' 
 'F'  'F'   0.0171   0.0103 
 'International Tables Vol C Tables 4.2.6.8 and 6.1.1.4' 
 
_symmetry_cell_setting            triclinic 
_symmetry_space_group_name_H-M    'P -1' 
 
loop_ 
 _symmetry_equiv_pos_as_xyz 
 'x, y, z' 
 '-x, -y, -z' 
 
_cell_length_a                    9.2256(4) 
_cell_length_b                    12.8767(5) 
_cell_length_c                    17.4297(7) 
_cell_angle_alpha                 89.505(2) 
_cell_angle_beta                  85.062(2) 
_cell_angle_gamma                 70.757(2) 
_cell_volume                      1947.20(14) 
_cell_formula_units_Z             2 
_cell_measurement_temperature     296(2) 
_cell_measurement_reflns_used     ? 
_cell_measurement_theta_min       ? 
_cell_measurement_theta_max       ? 
 
_exptl_crystal_description        prism 
_exptl_crystal_colour             colourless 
_exptl_crystal_size_max           0.20 
_exptl_crystal_size_mid           0.20 
_exptl_crystal_size_min           0.18 
_exptl_crystal_density_meas       ? 
_exptl_crystal_density_diffrn     1.558 
_exptl_crystal_density_method     'not measured' 
_exptl_crystal_F_000              936 
_exptl_absorpt_coefficient_mu     0.640 
_exptl_absorpt_correction_type    multi-scan 
_exptl_absorpt_correction_T_min   0.8826 
_exptl_absorpt_correction_T_max   0.8934 
_exptl_absorpt_process_details    'SADABS ' 
 
_exptl_special_details 
; 
 ? 
; 
 
_diffrn_ambient_temperature       296(2) 
_diffrn_radiation_wavelength      0.71073 
_diffrn_radiation_type            MoK\a 
_diffrn_radiation_source          'fine-focus sealed tube' 
_diffrn_radiation_monochromator   graphite 
_diffrn_measurement_device_type   ? 
_diffrn_measurement_method        ? 
_diffrn_detector_area_resol_mean  ? 
_diffrn_standards_number          ? 
_diffrn_standards_interval_count  ? 
_diffrn_standards_interval_time   ? 
_diffrn_standards_decay_%         ? 
_diffrn_reflns_number             27884 
_diffrn_reflns_av_R_equivalents   0.0387 
_diffrn_reflns_av_sigmaI/netI     0.0384 
_diffrn_reflns_limit_h_min        -10 
_diffrn_reflns_limit_h_max        10 
_diffrn_reflns_limit_k_min        -15 
_diffrn_reflns_limit_k_max        15 
_diffrn_reflns_limit_l_min        -20 
_diffrn_reflns_limit_l_max        20 
_diffrn_reflns_theta_min          1.68 
_diffrn_reflns_theta_max          24.99 
_reflns_number_total              6848 
_reflns_number_gt                 6225 
_reflns_threshold_expression      I>2sigma(I) 
 
_computing_data_collection        ? 
_computing_cell_refinement        ? 
_computing_data_reduction         ? 
_computing_structure_solution     'SHELXS-97 (Sheldrick, 1990)' 
_computing_structure_refinement   'SHELXL-97 (Sheldrick, 1997)' 
_computing_molecular_graphics     ? 
_computing_publication_material   ? 
 
_refine_special_details 
; 
 Refinement of F^2^ against ALL reflections.  The weighted R-factor wR and 
 goodness of fit S are based on F^2^, conventional R-factors R are based 
 on F, with F set to zero for negative F^2^. The threshold expression of 
 F^2^ > 2sigma(F^2^) is used only for calculating R-factors(gt) etc. and is 
 not relevant to the choice of reflections for refinement.  R-factors based 
 on F^2^ are statistically about twice as large as those based on F, and R- 
 factors based on ALL data will be even larger. 
; 
 
_refine_ls_structure_factor_coef  Fsqd  
_refine_ls_matrix_type            full 
_refine_ls_weighting_scheme       calc  
_refine_ls_weighting_details 
 'calc w=1/[\s^2^(Fo^2^)+(0.0222P)^2^+1.9650P] where P=(Fo^2^+2Fc^2^)/3' 
_atom_sites_solution_primary      direct 
_atom_sites_solution_secondary    difmap 
_atom_sites_solution_hydrogens    'difmap and geom' 
_refine_ls_hydrogen_treatment     constr 
_refine_ls_extinction_method      none 
_refine_ls_extinction_coef        ? 
_refine_ls_number_reflns          6848 
_refine_ls_number_parameters      541 
_refine_ls_number_restraints      0 
_refine_ls_R_factor_all           0.0409 
_refine_ls_R_factor_gt            0.0355 
_refine_ls_wR_factor_ref          0.0816 
_refine_ls_wR_factor_gt           0.0777 
_refine_ls_goodness_of_fit_ref    1.103 
_refine_ls_restrained_S_all       1.103 
_refine_ls_shift/su_max           0.001 
_refine_ls_shift/su_mean          0.000 
 
loop_ 
 _atom_site_label 
 _atom_site_type_symbol 
 _atom_site_fract_x 
 _atom_site_fract_y 
 _atom_site_fract_z 
 _atom_site_U_iso_or_equiv 
 _atom_site_adp_type 
 _atom_site_occupancy 
 _atom_site_symmetry_multiplicity 
 _atom_site_calc_flag 
 _atom_site_refinement_flags 
 _atom_site_disorder_assembly 
 _atom_site_disorder_group 
Cd1 Cd 0.75879(2) 0.503177(17) 0.492373(12) 0.02983(8) Uani 1 1 d . . . 
C1 C 0.9981(3) 0.4731(3) 0.61838(16) 0.0311(7) Uani 1 1 d . . . 
C2 C 0.9155(3) 0.4216(2) 0.67692(16) 0.0303(6) Uani 1 1 d . . . 
C3 C 0.7565(3) 0.4290(2) 0.67390(16) 0.0281(6) Uani 1 1 d . . . 
C4 C 0.6846(3) 0.3902(2) 0.74060(16) 0.0288(6) Uani 1 1 d . . . 
C5 C 0.5236(3) 0.4053(3) 0.74670(17) 0.0317(7) Uani 1 1 d . . . 
C6 C 0.4615(3) 0.3735(3) 0.81453(18) 0.0342(7) Uani 1 1 d . . . 
C7 C 0.5419(4) 0.3319(3) 0.87745(17) 0.0366(7) Uani 1 1 d . . . 
C8 C 0.6994(4) 0.3158(3) 0.86904(17) 0.0375(7) Uani 1 1 d . . . 
C9 C 0.7732(3) 0.3398(2) 0.80223(16) 0.0314(7) Uani 1 1 d . . . 
C10 C 0.9939(3) 0.3638(3) 0.73408(17) 0.0338(7) Uani 1 1 d . . . 
H10 H 1.0986 0.3543 0.7324 0.041 Uiso 1 1 calc R . . 
C11 C 1.0367(4) 0.2463(3) 0.84476(19) 0.0398(8) Uani 1 1 d . . . 
H11 H 1.0427 0.2789 0.8945 0.048 Uiso 1 1 calc R . . 
C12 C 1.1808(4) 0.1647(3) 0.8107(2) 0.0610(11) Uani 1 1 d . . . 
H12A H 1.2719 0.1495 0.8385 0.073 Uiso 1 1 calc R . . 
H12B H 1.2001 0.1614 0.7550 0.073 Uiso 1 1 calc R . . 
C13 C 1.0533(5) 0.1283(3) 0.8450(3) 0.0677(12) Uani 1 1 d . . . 
H13A H 0.9949 0.1028 0.8102 0.081 Uiso 1 1 calc R . . 
H13B H 1.0667 0.0909 0.8937 0.081 Uiso 1 1 calc R . . 
C14 C 0.5252(5) 0.2012(3) 0.9776(2) 0.0627(12) Uani 1 1 d . . . 
H14A H 0.4806 0.1551 0.9508 0.075 Uiso 1 1 d R A . 
H14B H 0.6361 0.1715 0.9663 0.075 Uiso 1 1 d R . . 
C15 C 0.4993(7) 0.1974(4) 1.0599(3) 0.0534(17) Uani 0.766(10) 1 d P A 1 
H15 H 0.5658 0.2314 1.0835 0.064 Uiso 0.766(10) 1 d PR A 1 
C15A C 0.434(2) 0.1668(13) 1.0353(9) 0.042(4) Uiso 0.234(10) 1 d P A 2 
H15A H 0.3680 0.1341 1.0103 0.051 Uiso 0.234(10) 1 calc PR A 2 
C16 C 0.2963(7) 0.3763(4) 1.0611(3) 0.0521(16) Uani 0.766(10) 1 d P A 1 
H16 H 0.3657 0.4083 1.0841 0.063 Uiso 0.766(10) 1 d PR A 1 
C16A C 0.243(2) 0.3467(15) 1.0373(10) 0.044(4) Uiso 0.234(10) 1 d P A 2 
H16A H 0.1747 0.3147 1.0129 0.053 Uiso 0.234(10) 1 calc PR A 2 
C17 C 0.3245(5) 0.3795(3) 0.9781(2) 0.0699(13) Uani 1 1 d . . . 
H17A H 0.3172 0.4550 0.9674 0.084 Uiso 1 1 d R A . 
H17B H 0.2467 0.3633 0.9509 0.084 Uiso 1 1 d R . . 
C18 C 0.5330(6) 0.0799(4) 1.0907(2) 0.0760(14) Uani 1 1 d . . . 
H18A H 0.4605 0.0454 1.0776 0.114 Uiso 1 1 d R A . 
H18B H 0.5305 0.0856 1.1457 0.114 Uiso 1 1 d R . . 
H18C H 0.6347 0.0366 1.0700 0.114 Uiso 1 1 d R . . 
C19 C 0.1348(6) 0.4400(4) 1.0926(3) 0.0820(15) Uani 1 1 d . . . 
H19A H 0.1113 0.5139 1.0746 0.123 Uiso 1 1 d R A . 
H19B H 0.1347 0.4404 1.1477 0.123 Uiso 1 1 d R . . 
H19C H 0.0586 0.4099 1.0780 0.123 Uiso 1 1 d R . . 
N1 N 0.4315(3) 0.4477(2) 0.69005(15) 0.0440(7) Uani 1 1 d . . . 
H1A H 0.3352 0.4548 0.6962 0.053 Uiso 1 1 calc R . . 
H1B H 0.4692 0.4676 0.6478 0.053 Uiso 1 1 calc R . . 
N2 N 0.9336(3) 0.3187(2) 0.79338(14) 0.0331(6) Uani 1 1 d . . . 
N3 N 0.4723(3) 0.3095(2) 0.94693(15) 0.0453(7) Uani 1 1 d . A . 
N4 N 0.3351(4) 0.2597(3) 1.08616(16) 0.0575(9) Uani 1 1 d . . . 
H1N H 0.3383 0.2637 1.1422 0.069 Uiso 1 1 d R A . 
O1 O 1.1424(2) 0.44806(19) 0.62059(12) 0.0406(5) Uani 1 1 d . . . 
O2 O 0.9234(2) 0.53894(18) 0.57148(12) 0.0372(5) Uani 1 1 d . . . 
O3 O 0.6796(2) 0.46752(18) 0.61853(11) 0.0362(5) Uani 1 1 d . . . 
F1 F 0.3088(2) 0.38389(18) 0.81745(11) 0.0489(5) Uani 1 1 d . . . 
F2 F 0.7769(2) 0.28527(19) 0.93305(10) 0.0571(6) Uani 1 1 d . . . 
C20 C 0.4261(3) 0.6614(2) 0.50607(16) 0.0302(6) Uani 1 1 d . . . 
C21 C 0.2990(3) 0.7519(2) 0.47306(17) 0.0310(7) Uani 1 1 d . . . 
C22 C 0.1403(3) 0.7549(2) 0.47720(16) 0.0297(6) Uani 1 1 d . . . 
C23 C 0.0319(3) 0.8495(2) 0.44407(17) 0.0306(6) Uani 1 1 d . . . 
C24 C -0.1281(3) 0.8629(3) 0.44686(18) 0.0345(7) Uani 1 1 d . . . 
C25 C -0.2223(3) 0.9505(3) 0.40840(19) 0.0385(7) Uani 1 1 d . . . 
C26 C -0.1780(4) 1.0350(3) 0.37305(18) 0.0368(7) Uani 1 1 d . . . 
C27 C -0.0227(4) 1.0235(2) 0.37924(19) 0.0359(7) Uani 1 1 d . . . 
C28 C 0.0823(3) 0.9310(2) 0.40672(17) 0.0313(7) Uani 1 1 d . . . 
C29 C 0.3387(3) 0.8288(2) 0.43135(18) 0.0344(7) Uani 1 1 d . . . 
H29 H 0.4425 0.8224 0.4260 0.041 Uiso 1 1 calc R . . 
C30 C 0.3040(4) 0.9724(3) 0.33817(19) 0.0390(8) Uani 1 1 d . . . 
H30 H 0.3092 1.0439 0.3537 0.047 Uiso 1 1 calc R . . 
C31 C 0.2733(5) 0.9609(4) 0.2573(2) 0.0694(13) Uani 1 1 d . . . 
H31A H 0.2582 1.0245 0.2248 0.083 Uiso 1 1 calc R . . 
H31B H 0.2121 0.9150 0.2468 0.083 Uiso 1 1 calc R . . 
C32 C 0.4298(4) 0.9058(3) 0.2815(2) 0.0546(10) Uani 1 1 d . . . 
H32A H 0.5101 0.9359 0.2640 0.065 Uiso 1 1 calc R . . 
H32B H 0.4639 0.8264 0.2860 0.065 Uiso 1 1 calc R . . 
C33 C -0.4384(4) 1.1496(3) 0.3392(2) 0.0490(9) Uani 1 1 d . . . 
H33A H -0.4764 1.1401 0.3915 0.059 Uiso 1 1 d R B . 
H33B H -0.4597 1.0968 0.3064 0.059 Uiso 1 1 d R . . 
C34 C -0.5251(4) 1.2640(4) 0.3151(2) 0.0457(12) Uani 0.908(8) 1 d P B 1 
H34 H -0.5225 1.3168 0.3546 0.055 Uiso 0.908(8) 1 d PR B 1 
C34A C -0.520(4) 1.204(3) 0.287(2) 0.032(9) Uiso 0.092(8) 1 d P B 2 
H34A H -0.5211 1.1491 0.2485 0.039 Uiso 0.092(8) 1 calc PR B 2 
C35 C -0.2908(5) 1.2753(4) 0.2474(3) 0.0526(13) Uani 0.908(8) 1 d P B 1 
H35 H -0.2824 1.3210 0.2903 0.063 Uiso 0.908(8) 1 d PR B 1 
C35A C -0.304(4) 1.218(3) 0.214(2) 0.038(10) Uiso 0.092(8) 1 d P B 2 
H35A H -0.3130 1.1696 0.1728 0.045 Uiso 0.092(8) 1 calc PR B 2 
C36 C -0.2108(4) 1.1577(3) 0.2633(2) 0.0539(10) Uani 1 1 d . . . 
H36A H -0.2220 1.1117 0.2219 0.065 Uiso 1 1 d R B . 
H36B H -0.1018 1.1459 0.2651 0.065 Uiso 1 1 d R . . 
C37 C -0.6908(4) 1.2739(3) 0.3066(2) 0.0525(9) Uani 1 1 d . . . 
H37A H -0.7452 1.3468 0.2904 0.079 Uiso 1 1 d R B . 
H37B H -0.7380 1.2606 0.3552 0.079 Uiso 1 1 d R . . 
H37C H -0.6948 1.2212 0.2689 0.079 Uiso 1 1 d R . . 
C38 C -0.2246(5) 1.3106(4) 0.1723(3) 0.0790(14) Uani 1 1 d . . . 
H38A H -0.2266 1.2633 0.1305 0.119 Uiso 1 1 d R B . 
H38B H -0.1202 1.3067 0.1776 0.119 Uiso 1 1 d R . . 
H38C H -0.2851 1.3850 0.1622 0.119 Uiso 1 1 d R . . 
N5 N -0.1902(3) 0.7921(2) 0.48455(17) 0.0484(8) Uani 1 1 d . . . 
H5A H -0.2870 0.8020 0.4843 0.058 Uiso 1 1 calc R . . 
H5B H -0.1325 0.7375 0.5086 0.058 Uiso 1 1 calc R . . 
N6 N 0.2404(3) 0.9142(2) 0.39674(15) 0.0337(6) Uani 1 1 d . . . 
N7 N -0.2722(3) 1.1252(2) 0.33613(16) 0.0431(7) Uani 1 1 d . B . 
N8 N -0.4558(3) 1.2889(2) 0.24068(17) 0.0499(7) Uani 1 1 d . . . 
H2N H -0.5072 1.3722 0.2339 0.060 Uiso 1 1 d R B . 
O4 O 0.5621(2) 0.66436(17) 0.49093(12) 0.0374(5) Uani 1 1 d . . . 
O5 O 0.3940(2) 0.59022(17) 0.54680(12) 0.0349(5) Uani 1 1 d . . . 
O6 O 0.0952(2) 0.68040(17) 0.50623(13) 0.0413(5) Uani 1 1 d . . . 
F3 F 0.0230(2) 1.11192(15) 0.36157(12) 0.0486(5) Uani 1 1 d . . . 
F4 F -0.3707(2) 0.95139(17) 0.40622(14) 0.0601(6) Uani 1 1 d . . . 
O1W O 0.1471(9) 0.1607(7) 1.0215(5) 0.095(4) Uiso 0.491(14) 1 d P . . 
O2W O 0.1116(15) 0.1091(12) 1.0641(9) 0.184(6) Uiso 0.509(14) 1 d P . . 
 
loop_ 
 _atom_site_aniso_label 
 _atom_site_aniso_U_11 
 _atom_site_aniso_U_22 
 _atom_site_aniso_U_33 
 _atom_site_aniso_U_23 
 _atom_site_aniso_U_13 
 _atom_site_aniso_U_12 
Cd1 0.02766(13) 0.03238(13) 0.03069(13) 0.01086(9) -0.00707(9) -0.01071(10) 
C1 0.0305(17) 0.0401(18) 0.0264(15) 0.0028(13) -0.0016(12) -0.0170(14) 
C2 0.0251(15) 0.0361(17) 0.0297(15) 0.0066(13) -0.0034(12) -0.0099(13) 
C3 0.0277(15) 0.0300(16) 0.0259(14) 0.0050(12) -0.0030(12) -0.0086(13) 
C4 0.0296(16) 0.0324(16) 0.0254(14) 0.0063(12) -0.0029(12) -0.0117(13) 
C5 0.0271(16) 0.0400(18) 0.0298(15) 0.0085(13) -0.0038(12) -0.0135(14) 
C6 0.0247(16) 0.0422(18) 0.0375(17) 0.0095(14) 0.0002(13) -0.0144(14) 
C7 0.0375(18) 0.0412(18) 0.0317(16) 0.0103(14) 0.0005(13) -0.0148(15) 
C8 0.0367(18) 0.0478(19) 0.0291(16) 0.0162(14) -0.0080(13) -0.0145(15) 
C9 0.0293(16) 0.0365(17) 0.0299(15) 0.0084(13) -0.0056(12) -0.0121(13) 
C10 0.0243(15) 0.0427(18) 0.0351(16) 0.0075(14) -0.0025(13) -0.0123(14) 
C11 0.0323(18) 0.048(2) 0.0387(18) 0.0162(15) -0.0119(14) -0.0102(15) 
C12 0.044(2) 0.067(3) 0.058(2) 0.020(2) -0.0082(18) 0.0015(19) 
C13 0.059(3) 0.053(2) 0.094(3) 0.030(2) -0.029(2) -0.017(2) 
C14 0.068(3) 0.051(2) 0.057(2) 0.0203(19) 0.018(2) -0.009(2) 
C15 0.067(4) 0.060(3) 0.037(3) 0.018(2) -0.010(2) -0.024(3) 
C16 0.066(4) 0.051(3) 0.035(3) 0.002(2) 0.006(2) -0.016(3) 
C17 0.071(3) 0.059(3) 0.056(2) 0.017(2) 0.030(2) 0.001(2) 
C18 0.104(4) 0.067(3) 0.048(2) 0.027(2) -0.001(2) -0.019(3) 
C19 0.093(4) 0.072(3) 0.059(3) -0.004(2) 0.032(3) -0.007(3) 
N1 0.0237(14) 0.075(2) 0.0353(15) 0.0216(14) -0.0068(11) -0.0182(14) 
N2 0.0251(13) 0.0431(15) 0.0310(13) 0.0135(11) -0.0069(10) -0.0103(11) 
N3 0.0388(16) 0.0532(18) 0.0371(15) 0.0218(13) 0.0051(12) -0.0086(13) 
N4 0.078(2) 0.057(2) 0.0302(15) 0.0082(14) 0.0102(15) -0.0165(17) 
O1 0.0255(12) 0.0600(15) 0.0396(12) 0.0165(11) -0.0045(9) -0.0184(11) 
O2 0.0368(12) 0.0499(14) 0.0319(11) 0.0155(10) -0.0083(9) -0.0226(11) 
O3 0.0284(11) 0.0544(14) 0.0277(11) 0.0161(10) -0.0067(9) -0.0157(10) 
F1 0.0291(10) 0.0767(14) 0.0461(11) 0.0183(10) -0.0023(8) -0.0251(10) 
F2 0.0407(12) 0.0954(17) 0.0341(10) 0.0304(11) -0.0108(9) -0.0197(11) 
C20 0.0295(16) 0.0316(16) 0.0294(15) 0.0028(12) -0.0086(12) -0.0084(13) 
C21 0.0271(16) 0.0295(16) 0.0355(16) 0.0061(13) -0.0051(12) -0.0078(13) 
C22 0.0297(16) 0.0247(15) 0.0323(15) 0.0062(12) -0.0028(12) -0.0058(13) 
C23 0.0286(16) 0.0289(16) 0.0345(16) 0.0047(13) -0.0060(13) -0.0093(13) 
C24 0.0295(16) 0.0331(17) 0.0390(17) 0.0071(13) -0.0030(13) -0.0081(14) 
C25 0.0220(16) 0.0424(19) 0.0504(19) 0.0100(15) -0.0073(14) -0.0088(14) 
C26 0.0345(18) 0.0342(17) 0.0399(17) 0.0062(14) -0.0089(14) -0.0078(14) 
C27 0.0358(18) 0.0282(16) 0.0472(19) 0.0103(14) -0.0073(14) -0.0146(14) 
C28 0.0277(16) 0.0285(16) 0.0380(16) 0.0043(13) -0.0069(13) -0.0086(13) 
C29 0.0263(16) 0.0345(17) 0.0435(18) 0.0085(14) -0.0095(13) -0.0101(13) 
C30 0.0348(18) 0.0371(18) 0.0495(19) 0.0155(15) -0.0080(15) -0.0170(15) 
C31 0.068(3) 0.103(4) 0.050(2) 0.025(2) -0.013(2) -0.045(3) 
C32 0.052(2) 0.055(2) 0.058(2) 0.0085(19) 0.0050(19) -0.0217(19) 
C33 0.0357(19) 0.052(2) 0.051(2) 0.0160(17) -0.0044(16) -0.0026(16) 
C34 0.049(2) 0.039(2) 0.040(2) 0.0015(18) -0.0128(17) 0.0007(18) 
C35 0.053(3) 0.046(3) 0.059(3) 0.018(2) -0.013(2) -0.016(2) 
C36 0.041(2) 0.059(2) 0.056(2) 0.0218(19) -0.0069(17) -0.0080(18) 
C37 0.043(2) 0.051(2) 0.049(2) 0.0070(17) -0.0086(17) 0.0054(17) 
C38 0.072(3) 0.082(3) 0.087(3) 0.044(3) -0.010(3) -0.031(3) 
N5 0.0272(15) 0.0518(18) 0.069(2) 0.0263(16) -0.0095(14) -0.0163(13) 
N6 0.0295(14) 0.0325(14) 0.0416(15) 0.0129(11) -0.0068(11) -0.0132(11) 
N7 0.0345(15) 0.0429(16) 0.0496(17) 0.0182(13) -0.0109(13) -0.0086(13) 
N8 0.0483(18) 0.0421(17) 0.0534(18) 0.0160(14) -0.0108(14) -0.0059(14) 
O4 0.0263(11) 0.0367(12) 0.0481(13) 0.0126(10) -0.0065(10) -0.0085(9) 
O5 0.0374(12) 0.0368(12) 0.0366(11) 0.0121(10) -0.0126(9) -0.0185(10) 
O6 0.0296(12) 0.0316(12) 0.0598(15) 0.0169(11) -0.0002(10) -0.0077(10) 
F3 0.0444(11) 0.0333(10) 0.0716(13) 0.0185(9) -0.0142(10) -0.0156(9) 
F4 0.0299(11) 0.0603(14) 0.0936(17) 0.0346(12) -0.0193(11) -0.0169(10) 
 
_geom_special_details 
; 
 All esds (except the esd in the dihedral angle between two l.s. planes) 
 are estimated using the full covariance matrix.  The cell esds are taken 
 into account individually in the estimation of esds in distances, angles 
 and torsion angles; correlations between esds in cell parameters are only 
 used when they are defined by crystal symmetry.  An approximate (isotropic) 
 treatment of cell esds is used for estimating esds involving l.s. planes. 
; 
 
loop_ 
 _geom_bond_atom_site_label_1 
 _geom_bond_atom_site_label_2 
 _geom_bond_distance 
 _geom_bond_site_symmetry_2 
 _geom_bond_publ_flag 
Cd1 O4 2.264(2) . y 
Cd1 O1 2.269(2) 2_766 y 
Cd1 O5 2.280(2) 2_666 y 
Cd1 O2 2.292(2) . y 
Cd1 O6 2.304(2) 2_666 y 
Cd1 O3 2.3466(19) . y 

C1 O2 1.250(3) . ?
C1 O1 1.266(3) . ? 
C1 C2 1.500(4) . ? 
C2 C10 1.351(4) . ? 
C2 C3 1.444(4) . ? 
C3 O3 1.248(3) . ? 
C3 C4 1.455(4) . ? 
C4 C9 1.426(4) . ? 
C4 C5 1.428(4) . ? 
C5 N1 1.351(4) . ? 
C5 C6 1.387(4) . ? 
C6 F1 1.366(3) . ? 
C6 C7 1.382(4) . ? 
C7 C8 1.393(4) . ? 
C7 N3 1.395(4) . ? 
C8 F2 1.362(3) . ? 
C8 C9 1.382(4) . ? 
C9 N2 1.408(4) . ? 
C10 N2 1.349(4) . ? 
C10 H10 0.9300 . ? 
C11 N2 1.458(4) . ? 
C11 C13 1.476(5) . ? 
C11 C12 1.476(5) . ? 
C11 H11 0.9800 . ? 
C12 C13 1.482(5) . ? 
C12 H12A 0.9700 . ? 
C12 H12B 0.9700 . ? 
C13 H13A 0.9700 . ? 
C13 H13B 0.9700 . ? 
C14 C15A 1.417(15) . ? 
C14 N3 1.432(4) . ? 
C14 C15 1.437(6) . ? 
C14 H14A 0.9700 . ? 
C14 H14B 0.9700 . ? 
C15 N4 1.494(6) . ? 
C15 C18 1.542(6) . ? 
C15 H15 0.9800 . ? 
C15A N4 1.487(15) . ? 
C15A C18 1.572(16) . ? 
C15A H15A 0.9800 . ? 
C16 C17 1.450(6) . ? 
C16 N4 1.495(6) . ? 
C16 C19 1.502(6) . ? 
C16 H16 0.9800 . ? 
C16A C17 1.372(16) . ? 
C16A N4 1.479(17) . ? 
C16A C19 1.558(17) . ? 
C16A H16A 0.9800 . ? 
C17 N3 1.427(4) . ? 
C17 H17A 0.9700 . ? 
C17 H17B 0.9700 . ? 
C18 H18A 0.9600 . ? 
C18 H18B 0.9600 . ? 
C18 H18C 0.9600 . ? 
C19 H19A 0.9600 . ? 
C19 H19B 0.9600 . ? 
C19 H19C 0.9600 . ? 
N1 H1A 0.8600 . ? 
N1 H1B 0.8600 . ? 
N4 H1N 0.9825 . ? 
O1 Cd1 2.269(2) 2_766 ? 
C20 O5 1.250(3) . ? 
C20 O4 1.273(3) . ? 
C20 C21 1.506(4) . ? 
C21 C29 1.351(4) . ? 
C21 C22 1.447(4) . ? 
C22 O6 1.252(3) . ? 
C22 C23 1.450(4) . ? 
C23 C28 1.414(4) . ? 
C23 C24 1.425(4) . ? 
C24 N5 1.364(4) . ? 
C24 C25 1.385(4) . ? 
C25 F4 1.369(3) . ? 
C25 C26 1.403(4) . ? 
C26 N7 1.391(4) . ? 
C26 C27 1.405(4) . ? 
C27 F3 1.363(3) . ? 
C27 C28 1.376(4) . ? 
C28 N6 1.398(4) . ? 
C29 N6 1.349(4) . ? 
C29 H29 0.9300 . ? 
C30 N6 1.456(4) . ? 
C30 C31 1.479(5) . ? 
C30 C32 1.489(5) . ? 
C30 H30 0.9800 . ? 
C31 C32 1.480(6) . ? 
C31 H31A 0.9700 . ? 
C31 H31B 0.9700 . ? 
C32 H32A 0.9700 . ? 
C32 H32B 0.9700 . ? 
C33 C34A 1.29(3) . ? 
C33 N7 1.457(4) . ? 
C33 C34 1.502(5) . ? 
C33 H33A 0.9700 . ? 
C33 H33B 0.9700 . ? 
C34 N8 1.476(5) . ? 
C34 C37 1.512(5) . ? 
C34 H34 0.9800 . ? 
C34A C37 1.54(3) . ? 
C34A N8 1.59(3) . ? 
C34A H34A 0.9800 . ? 
C35 C36 1.485(5) . ? 
C35 N8 1.488(5) . ? 
C35 C38 1.526(5) . ? 
C35 H35 0.9800 . ? 
C35A C36 1.33(4) . ? 
C35A N8 1.44(4) . ? 
C35A C38 1.71(4) . ? 
C35A H35A 0.9800 . ? 
C36 N7 1.460(4) . ? 
C36 H36A 0.9700 . ? 
C36 H36B 0.9700 . ? 
C37 H37A 0.9600 . ? 
C37 H37B 0.9600 . ? 
C37 H37C 0.9600 . ? 
C38 H38A 0.9600 . ? 
C38 H38B 0.9600 . ? 
C38 H38C 0.9600 . ? 
N5 H5A 0.8600 . ? 
N5 H5B 0.8600 . ? 
N8 H2N 1.0306 . ? 
O5 Cd1 2.280(2) 2_666 ? 
O6 Cd1 2.304(2) 2_666 ? 
O1W O2W 1.093(14) . ? 
 
loop_ 
 _geom_angle_atom_site_label_1 
 _geom_angle_atom_site_label_2 
 _geom_angle_atom_site_label_3 
 _geom_angle 
 _geom_angle_site_symmetry_1 
 _geom_angle_site_symmetry_3 
 _geom_angle_publ_flag 

O4 Cd1 O1 87.58(8) . 2_766 y
O4 Cd1 O5 90.75(8) . 2_666 y 
O1 Cd1 O5 102.81(8) 2_766 2_666 y 
O4 Cd1 O2 104.12(8) . . y 
O1 Cd1 O2 98.16(7) 2_766 . y 
O5 Cd1 O2 154.76(7) 2_666 . y 
O4 Cd1 O6 164.30(7) . 2_666 y 
O1 Cd1 O6 100.15(8) 2_766 2_666 y 
O5 Cd1 O6 74.28(8) 2_666 2_666 y 
O2 Cd1 O6 88.40(8) . 2_666 y 
O4 Cd1 O3 92.27(7) . . y 
O1 Cd1 O3 170.82(8) 2_766 . y
O5 Cd1 O3 86.37(7) 2_666 . y 
O2 Cd1 O3 72.97(7) . . y 
O6 Cd1 O3 82.26(8) 2_666 . y 

O2 C1 O1 123.4(3) . . ?
O2 C1 C2 119.7(3) . . ? 
O1 C1 C2 116.9(3) . . ? 
C10 C2 C3 118.5(3) . . ? 
C10 C2 C1 118.7(3) . . ? 
C3 C2 C1 122.8(3) . . ? 
O3 C3 C2 123.7(2) . . ? 
O3 C3 C4 119.7(3) . . ? 
C2 C3 C4 116.6(2) . . ? 
C9 C4 C5 118.9(2) . . ? 
C9 C4 C3 120.4(3) . . ? 
C5 C4 C3 120.7(3) . . ? 
N1 C5 C6 119.5(3) . . ? 
N1 C5 C4 123.3(3) . . ? 
C6 C5 C4 117.2(3) . . ? 
F1 C6 C7 118.8(2) . . ? 
F1 C6 C5 116.1(3) . . ? 
C7 C6 C5 125.2(3) . . ? 
C6 C7 C8 116.2(3) . . ? 
C6 C7 N3 123.2(3) . . ? 
C8 C7 N3 120.6(3) . . ? 
F2 C8 C9 120.3(3) . . ? 
F2 C8 C7 116.6(3) . . ? 
C9 C8 C7 122.9(3) . . ? 
C8 C9 N2 122.2(3) . . ? 
C8 C9 C4 119.4(3) . . ? 
N2 C9 C4 118.4(2) . . ? 
N2 C10 C2 125.6(3) . . ? 
N2 C10 H10 117.2 . . ? 
C2 C10 H10 117.2 . . ? 
N2 C11 C13 119.0(3) . . ? 
N2 C11 C12 118.5(3) . . ? 
C13 C11 C12 60.3(3) . . ? 
N2 C11 H11 115.9 . . ? 
C13 C11 H11 115.9 . . ? 
C12 C11 H11 115.9 . . ? 
C11 C12 C13 59.8(2) . . ? 
C11 C12 H12A 117.8 . . ? 
C13 C12 H12A 117.8 . . ? 
C11 C12 H12B 117.8 . . ? 
C13 C12 H12B 117.8 . . ? 
H12A C12 H12B 114.9 . . ? 
C11 C13 C12 59.9(2) . . ? 
C11 C13 H13A 117.8 . . ? 
C12 C13 H13A 117.8 . . ? 
C11 C13 H13B 117.8 . . ? 
C12 C13 H13B 117.8 . . ? 
H13A C13 H13B 114.9 . . ? 
C15A C14 N3 121.2(7) . . ? 
C15A C14 C15 38.9(7) . . ? 
N3 C14 C15 114.5(4) . . ? 
C15A C14 H14A 74.9 . . ? 
N3 C14 H14A 108.3 . . ? 
C15 C14 H14A 112.7 . . ? 
C15A C14 H14B 127.2 . . ? 
N3 C14 H14B 108.3 . . ? 
C15 C14 H14B 105.4 . . ? 
H14A C14 H14B 107.4 . . ? 
C14 C15 N4 110.6(4) . . ? 
C14 C15 C18 113.7(4) . . ? 
N4 C15 C18 106.7(4) . . ? 
C14 C15 H15 108.6 . . ? 
N4 C15 H15 108.8 . . ? 
C18 C15 H15 108.4 . . ? 
C14 C15A N4 112.2(11) . . ? 
C14 C15A C18 113.1(11) . . ? 
N4 C15A C18 105.5(10) . . ? 
C14 C15A H14A 38.8 . . ? 
N4 C15A H14A 133.6 . . ? 
C18 C15A H14A 118.9 . . ? 
C14 C15A H15A 108.6 . . ? 
N4 C15A H15A 108.6 . . ? 
C18 C15A H15A 108.6 . . ? 
H14A C15A H15A 70.7 . . ? 
C17 C16 N4 110.0(4) . . ? 
C17 C16 C19 114.7(5) . . ? 
N4 C16 C19 109.1(4) . . ? 
C17 C16 H16 107.6 . . ? 
N4 C16 H16 107.9 . . ? 
C19 C16 H16 107.4 . . ? 
C17 C16A N4 115.5(12) . . ? 
C17 C16A C19 115.9(12) . . ? 
N4 C16A C19 106.9(11) . . ? 
C17 C16A H16A 105.9 . . ? 
N4 C16A H16A 105.9 . . ? 
C19 C16A H16A 105.9 . . ? 
C17 C16A H17B 38.8 . . ? 
N4 C16A H17B 133.1 . . ? 
C19 C16A H17B 119.6 . . ? 
H16A C16A H17B 67.8 . . ? 
C16A C17 N3 121.6(7) . . ? 
C16A C17 C16 35.0(8) . . ? 
N3 C17 C16 115.0(4) . . ? 
C16A C17 H17A 125.4 . . ? 
N3 C17 H17A 108.2 . . ? 
C16 C17 H17A 105.1 . . ? 
C16A C17 H17B 78.7 . . ? 
N3 C17 H17B 108.1 . . ? 
C16 C17 H17B 112.8 . . ? 
H17A C17 H17B 107.3 . . ? 
C15 C18 C15A 35.5(6) . . ? 
C15 C18 H18A 113.7 . . ? 
C15A C18 H18A 78.8 . . ? 
C15 C18 H18B 106.8 . . ? 
C15A C18 H18B 127.4 . . ? 
H18A C18 H18B 109.5 . . ? 
C15 C18 H18C 107.9 . . ? 
C15A C18 H18C 116.2 . . ? 
H18A C18 H18C 109.5 . . ? 
H18B C18 H18C 109.5 . . ? 
C16 C19 C16A 32.3(7) . . ? 
C16 C19 H19A 107.7 . . ? 
C16A C19 H19A 116.7 . . ? 
C16 C19 H19B 106.6 . . ? 
C16A C19 H19B 125.0 . . ? 
H19A C19 H19B 109.5 . . ? 
C16 C19 H19C 114.0 . . ? 
C16A C19 H19C 82.1 . . ? 
H19A C19 H19C 109.5 . . ? 
H19B C19 H19C 109.5 . . ? 
C5 N1 H1A 120.0 . . ? 
C5 N1 H1B 120.0 . . ? 
H1A N1 H1B 120.0 . . ? 
C10 N2 C9 119.0(2) . . ? 
C10 N2 C11 119.1(2) . . ? 
C9 N2 C11 121.9(2) . . ? 
C7 N3 C17 121.8(3) . . ? 
C7 N3 C14 119.7(3) . . ? 
C17 N3 C14 116.2(3) . . ? 
C16A N4 C15A 108.4(10) . . ? 
C16A N4 C15 119.7(6) . . ? 
C15A N4 C15 37.2(7) . . ? 
C16A N4 C16 33.3(7) . . ? 
C15A N4 C16 121.4(6) . . ? 
C15 N4 C16 109.6(4) . . ? 
C16A N4 H1N 126.7 . . ? 
C15A N4 H1N 124.7 . . ? 
C15 N4 H1N 102.1 . . ? 
C16 N4 H1N 104.6 . . ? 
C1 O1 Cd1 108.19(18) . 2_766 ? 
C1 O2 Cd1 125.06(19) . . ? 
C3 O3 Cd1 130.58(18) . . ? 
O5 C20 O4 124.0(3) . . ? 
O5 C20 C21 119.8(3) . . ? 
O4 C20 C21 116.2(3) . . ? 
C29 C21 C22 118.4(3) . . ? 
C29 C21 C20 117.6(3) . . ? 
C22 C21 C20 123.7(2) . . ? 
O6 C22 C21 123.5(3) . . ? 
O6 C22 C23 120.0(3) . . ? 
C21 C22 C23 116.5(2) . . ? 
C28 C23 C24 117.7(3) . . ? 
C28 C23 C22 120.9(3) . . ? 
C24 C23 C22 121.5(3) . . ? 
N5 C24 C25 119.4(3) . . ? 
N5 C24 C23 122.5(3) . . ? 
C25 C24 C23 118.1(3) . . ? 
F4 C25 C24 114.8(3) . . ? 
F4 C25 C26 119.4(3) . . ? 
C24 C25 C26 125.8(3) . . ? 
N7 C26 C25 126.5(3) . . ? 
N7 C26 C27 120.1(3) . . ? 
C25 C26 C27 113.3(3) . . ? 
F3 C27 C28 118.6(3) . . ? 
F3 C27 C26 117.6(3) . . ? 
C28 C27 C26 123.7(3) . . ? 
C27 C28 N6 121.0(3) . . ? 
C27 C28 C23 120.4(3) . . ? 
N6 C28 C23 118.6(3) . . ? 
N6 C29 C21 125.5(3) . . ? 
N6 C29 H29 117.3 . . ? 
C21 C29 H29 117.3 . . ? 
N6 C30 C31 117.9(3) . . ? 
N6 C30 C32 117.9(3) . . ? 
C31 C30 C32 59.8(3) . . ? 
N6 C30 H30 116.4 . . ? 
C31 C30 H30 116.4 . . ? 
C32 C30 H30 116.4 . . ? 
C30 C31 C32 60.4(2) . . ? 
C30 C31 H31A 117.7 . . ? 
C32 C31 H31A 117.7 . . ? 
C30 C31 H31B 117.7 . . ? 
C32 C31 H31B 117.7 . . ? 
H31A C31 H31B 114.8 . . ? 
C31 C32 C30 59.8(3) . . ? 
C31 C32 H32A 117.8 . . ? 
C30 C32 H32A 117.8 . . ? 
C31 C32 H32B 117.8 . . ? 
C30 C32 H32B 117.8 . . ? 
H32A C32 H32B 114.9 . . ? 
C34A C33 N7 122.7(14) . . ? 
C34A C33 C34 36.9(19) . . ? 
N7 C33 C34 114.0(3) . . ? 
C34A C33 H33A 125.8 . . ? 
N7 C33 H33A 108.7 . . ? 
C34 C33 H33A 108.4 . . ? 
C34A C33 H33B 72.7 . . ? 
N7 C33 H33B 108.7 . . ? 
C34 C33 H33B 109.2 . . ? 
H33A C33 H33B 107.6 . . ? 
N8 C34 C33 110.6(3) . . ? 
N8 C34 C37 108.8(3) . . ? 
C33 C34 C37 109.6(4) . . ? 
N8 C34 H34 109.6 . . ? 
C33 C34 H34 109.2 . . ? 
C37 C34 H34 109.1 . . ? 
C33 C34A C37 121(2) . . ? 
C33 C34A N8 116(2) . . ? 
C37 C34A N8 102(2) . . ? 
C33 C34A H33B 42.9 . . ? 
C37 C34A H33B 123.2 . . ? 
N8 C34A H33B 135.0 . . ? 
C33 C34A H34A 105.6 . . ? 
C37 C34A H34A 105.6 . . ? 
N8 C34A H34A 105.6 . . ? 
H33B C34A H34A 63.6 . . ? 
C36 C35 N8 107.4(3) . . ? 
C36 C35 C38 111.9(4) . . ? 
N8 C35 C38 108.7(3) . . ? 
C36 C35 H35 109.4 . . ? 
N8 C35 H35 109.7 . . ? 
C38 C35 H35 109.7 . . ? 
C36 C35A N8 120(3) . . ? 
C36 C35A C38 110(2) . . ? 
N8 C35A C38 102(2) . . ? 
C36 C35A H35A 108.4 . . ? 
N8 C35A H35A 108.4 . . ? 
C38 C35A H35A 108.4 . . ? 
C36 C35A H36A 42.5 . . ? 
N8 C35A H36A 134.8 . . ? 
C38 C35A H36A 122.9 . . ? 
H35A C35A H36A 65.9 . . ? 
C35A C36 N7 121.4(15) . . ? 
C35A C36 C35 40.6(19) . . ? 
N7 C36 C35 111.6(3) . . ? 
C35A C36 H36A 69.5 . . ? 
N7 C36 H36A 109.2 . . ? 
C35 C36 H36A 109.8 . . ? 
C35A C36 H36B 127.3 . . ? 
N7 C36 H36B 109.3 . . ? 
C35 C36 H36B 108.9 . . ? 
H36A C36 H36B 107.9 . . ? 
C34 C37 C34A 34.4(15) . . ? 
C34 C37 H37A 109.2 . . ? 
C34A C37 H37A 128.6 . . ? 
C34 C37 H37B 109.3 . . ? 
C34A C37 H37B 116.5 . . ? 
H37A C37 H37B 109.5 . . ? 
C34 C37 H37C 109.9 . . ? 
C34A C37 H37C 76.1 . . ? 
H37A C37 H37C 109.5 . . ? 
H37B C37 H37C 109.5 . . ? 
C35 C38 C35A 35.0(14) . . ? 
C35 C38 H38A 110.3 . . ? 
C35A C38 H38A 75.4 . . ? 
C35 C38 H38B 109.0 . . ? 
C35A C38 H38B 122.8 . . ? 
H38A C38 H38B 109.5 . . ? 
C35 C38 H38C 109.0 . . ? 
C35A C38 H38C 122.6 . . ? 
H38A C38 H38C 109.5 . . ? 
H38B C38 H38C 109.5 . . ? 
C24 N5 H5A 120.0 . . ? 
C24 N5 H5B 120.0 . . ? 
H5A N5 H5B 120.0 . . ? 
C29 N6 C28 119.4(2) . . ? 
C29 N6 C30 118.3(2) . . ? 
C28 N6 C30 121.1(2) . . ? 
C26 N7 C33 121.7(3) . . ? 
C26 N7 C36 118.1(3) . . ? 
C33 N7 C36 111.8(3) . . ? 
C35A N8 C34 118.2(14) . . ? 
C35A N8 C35 39.4(17) . . ? 
C34 N8 C35 109.4(3) . . ? 
C35A N8 C34A 101(2) . . ? 
C34 N8 C34A 34.1(15) . . ? 
C35 N8 C34A 116.0(12) . . ? 
C35A N8 H2N 129.5 . . ? 
C34 N8 H2N 105.4 . . ? 
C35 N8 H2N 104.2 . . ? 
C34A N8 H2N 129.5 . . ? 
C20 O4 Cd1 117.30(18) . . ? 
C20 O5 Cd1 121.92(18) . 2_666 ? 
C22 O6 Cd1 125.21(19) . 2_666 ? 
 
loop_ 
 _geom_torsion_atom_site_label_1 
 _geom_torsion_atom_site_label_2 
 _geom_torsion_atom_site_label_3 
 _geom_torsion_atom_site_label_4 
 _geom_torsion 
 _geom_torsion_site_symmetry_1 
 _geom_torsion_site_symmetry_2 
 _geom_torsion_site_symmetry_3 
 _geom_torsion_site_symmetry_4 
 _geom_torsion_publ_flag 
O2 C1 C2 C10 -170.3(3) . . . . ? 
O1 C1 C2 C10 8.4(4) . . . . ? 
O2 C1 C2 C3 11.1(4) . . . . ? 
O1 C1 C2 C3 -170.2(3) . . . . ? 
C10 C2 C3 O3 -170.3(3) . . . . ? 
C1 C2 C3 O3 8.3(5) . . . . ? 
C10 C2 C3 C4 10.7(4) . . . . ? 
C1 C2 C3 C4 -170.7(3) . . . . ? 
O3 C3 C4 C9 176.2(3) . . . . ? 
C2 C3 C4 C9 -4.8(4) . . . . ? 
O3 C3 C4 C5 -6.1(4) . . . . ? 
C2 C3 C4 C5 173.0(3) . . . . ? 
C9 C4 C5 N1 -177.0(3) . . . . ? 
C3 C4 C5 N1 5.2(5) . . . . ? 
C9 C4 C5 C6 2.5(4) . . . . ? 
C3 C4 C5 C6 -175.3(3) . . . . ? 
N1 C5 C6 F1 2.6(4) . . . . ? 
C4 C5 C6 F1 -176.9(3) . . . . ? 
N1 C5 C6 C7 -178.2(3) . . . . ? 
C4 C5 C6 C7 2.3(5) . . . . ? 
F1 C6 C7 C8 175.5(3) . . . . ? 
C5 C6 C7 C8 -3.7(5) . . . . ? 
F1 C6 C7 N3 -6.3(5) . . . . ? 
C5 C6 C7 N3 174.5(3) . . . . ? 
C6 C7 C8 F2 173.7(3) . . . . ? 
N3 C7 C8 F2 -4.5(5) . . . . ? 
C6 C7 C8 C9 0.2(5) . . . . ? 
N3 C7 C8 C9 -178.1(3) . . . . ? 
F2 C8 C9 N2 9.5(5) . . . . ? 
C7 C8 C9 N2 -177.2(3) . . . . ? 
F2 C8 C9 C4 -168.9(3) . . . . ? 
C7 C8 C9 C4 4.4(5) . . . . ? 
C5 C4 C9 C8 -5.7(4) . . . . ? 
C3 C4 C9 C8 172.1(3) . . . . ? 
C5 C4 C9 N2 175.9(3) . . . . ? 
C3 C4 C9 N2 -6.3(4) . . . . ? 
C3 C2 C10 N2 -5.7(5) . . . . ? 
C1 C2 C10 N2 175.6(3) . . . . ? 
N2 C11 C12 C13 -109.0(4) . . . . ? 
N2 C11 C13 C12 108.1(3) . . . . ? 
C15A C14 C15 N4 -59.2(10) . . . . ? 
N3 C14 C15 N4 50.8(6) . . . . ? 
C15A C14 C15 C18 60.8(11) . . . . ? 
N3 C14 C15 C18 170.8(4) . . . . ? 
N3 C14 C15A N4 -30.4(17) . . . . ? 
C15 C14 C15A N4 60.7(11) . . . . ? 
N3 C14 C15A C18 -149.7(7) . . . . ? 
C15 C14 C15A C18 -58.5(11) . . . . ? 
N4 C16A C17 N3 24(2) . . . . ? 
C19 C16A C17 N3 149.7(9) . . . . ? 
N4 C16A C17 C16 -65.7(15) . . . . ? 
C19 C16A C17 C16 60.5(14) . . . . ? 
N4 C16 C17 C16A 60.0(13) . . . . ? 
C19 C16 C17 C16A -63.4(13) . . . . ? 
N4 C16 C17 N3 -50.0(7) . . . . ? 
C19 C16 C17 N3 -173.3(4) . . . . ? 
C14 C15 C18 C15A -58.2(10) . . . . ? 
N4 C15 C18 C15A 63.9(10) . . . . ? 
C14 C15A C18 C15 59.2(11) . . . . ? 
N4 C15A C18 C15 -63.8(11) . . . . ? 
C17 C16 C19 C16A 57.7(12) . . . . ? 
N4 C16 C19 C16A -66.1(12) . . . . ? 
C17 C16A C19 C16 -64.5(14) . . . . ? 
N4 C16A C19 C16 65.8(13) . . . . ? 
C2 C10 N2 C9 -5.9(5) . . . . ? 
C2 C10 N2 C11 171.8(3) . . . . ? 
C8 C9 N2 C10 -166.6(3) . . . . ? 
C4 C9 N2 C10 11.8(4) . . . . ? 
C8 C9 N2 C11 15.8(5) . . . . ? 
C4 C9 N2 C11 -165.9(3) . . . . ? 
C13 C11 N2 C10 -112.5(4) . . . . ? 
C12 C11 N2 C10 -42.6(4) . . . . ? 
C13 C11 N2 C9 65.2(4) . . . . ? 
C12 C11 N2 C9 135.1(3) . . . . ? 
C6 C7 N3 C17 -38.6(5) . . . . ? 
C8 C7 N3 C17 139.5(4) . . . . ? 
C6 C7 N3 C14 123.6(4) . . . . ? 
C8 C7 N3 C14 -58.3(5) . . . . ? 
C16A C17 N3 C7 166.5(12) . . . . ? 
C16 C17 N3 C7 -154.2(4) . . . . ? 
C16A C17 N3 C14 3.7(13) . . . . ? 
C16 C17 N3 C14 43.0(6) . . . . ? 
C15A C14 N3 C7 -162.9(10) . . . . ? 
C15 C14 N3 C7 153.5(4) . . . . ? 
C15A C14 N3 C17 0.3(11) . . . . ? 
C15 C14 N3 C17 -43.3(6) . . . . ? 
C17 C16A N4 C15A -52(2) . . . . ? 
C19 C16A N4 C15A 177.4(10) . . . . ? 
C17 C16A N4 C15 -13(2) . . . . ? 
C19 C16A N4 C15 -143.6(7) . . . . ? 
C17 C16A N4 C16 67.5(15) . . . . ? 
C19 C16A N4 C16 -63.1(13) . . . . ? 
C14 C15A N4 C16A 54.4(18) . . . . ? 
C18 C15A N4 C16A 178.0(10) . . . . ? 
C14 C15A N4 C15 -60.7(11) . . . . ? 
C18 C15A N4 C15 62.9(11) . . . . ? 
C14 C15A N4 C16 20.4(18) . . . . ? 
C18 C15A N4 C16 144.0(6) . . . . ? 
C14 C15 N4 C16A -23.2(13) . . . . ? 
C18 C15 N4 C16A -147.3(10) . . . . ? 
C14 C15 N4 C15A 58.2(10) . . . . ? 
C18 C15 N4 C15A -65.9(10) . . . . ? 
C14 C15 N4 C16 -58.3(6) . . . . ? 
C18 C15 N4 C16 177.6(4) . . . . ? 
C17 C16 N4 C16A -57.1(12) . . . . ? 
C19 C16 N4 C16A 69.5(13) . . . . ? 
C17 C16 N4 C15A 18.1(13) . . . . ? 
C19 C16 N4 C15A 144.7(9) . . . . ? 
C17 C16 N4 C15 57.4(7) . . . . ? 
C19 C16 N4 C15 -176.0(4) . . . . ? 
O2 C1 O1 Cd1 -17.4(4) . . . 2_766 ? 
C2 C1 O1 Cd1 163.9(2) . . . 2_766 ? 
O1 C1 O2 Cd1 127.6(3) . . . . ? 
C2 C1 O2 Cd1 -53.8(3) . . . . ? 
O4 Cd1 O2 C1 142.0(2) . . . . ? 
O1 Cd1 O2 C1 -128.4(2) 2_766 . . . ? 
O5 Cd1 O2 C1 17.6(3) 2_666 . . . ? 
O6 Cd1 O2 C1 -28.4(2) 2_666 . . . ? 
O3 Cd1 O2 C1 54.0(2) . . . . ? 
C2 C3 O3 Cd1 15.7(4) . . . . ? 
C4 C3 O3 Cd1 -165.25(19) . . . . ? 
O4 Cd1 O3 C3 -139.1(3) . . . . ? 
O1 Cd1 O3 C3 -50.2(6) 2_766 . . . ? 
O5 Cd1 O3 C3 130.3(3) 2_666 . . . ? 
O2 Cd1 O3 C3 -35.0(3) . . . . ? 
O6 Cd1 O3 C3 55.7(3) 2_666 . . . ? 
O5 C20 C21 C29 178.0(3) . . . . ? 
O4 C20 C21 C29 -0.8(4) . . . . ? 
O5 C20 C21 C22 -8.2(4) . . . . ? 
O4 C20 C21 C22 173.0(3) . . . . ? 
C29 C21 C22 O6 171.1(3) . . . . ? 
C20 C21 C22 O6 -2.6(5) . . . . ? 
C29 C21 C22 C23 -7.7(4) . . . . ? 
C20 C21 C22 C23 178.5(3) . . . . ? 
O6 C22 C23 C28 -176.0(3) . . . . ? 
C21 C22 C23 C28 2.9(4) . . . . ? 
O6 C22 C23 C24 3.0(5) . . . . ? 
C21 C22 C23 C24 -178.1(3) . . . . ? 
C28 C23 C24 N5 -176.8(3) . . . . ? 
C22 C23 C24 N5 4.1(5) . . . . ? 
C28 C23 C24 C25 4.4(4) . . . . ? 
C22 C23 C24 C25 -174.7(3) . . . . ? 
N5 C24 C25 F4 -5.8(5) . . . . ? 
C23 C24 C25 F4 173.0(3) . . . . ? 
N5 C24 C25 C26 174.1(3) . . . . ? 
C23 C24 C25 C26 -7.0(5) . . . . ? 
F4 C25 C26 N7 1.9(5) . . . . ? 
C24 C25 C26 N7 -178.0(3) . . . . ? 
F4 C25 C26 C27 -179.6(3) . . . . ? 
C24 C25 C26 C27 0.4(5) . . . . ? 
N7 C26 C27 F3 12.2(5) . . . . ? 
C25 C26 C27 F3 -166.4(3) . . . . ? 
N7 C26 C27 C28 -172.2(3) . . . . ? 
C25 C26 C27 C28 9.2(5) . . . . ? 
F3 C27 C28 N6 -18.0(5) . . . . ? 
C26 C27 C28 N6 166.4(3) . . . . ? 
F3 C27 C28 C23 163.6(3) . . . . ? 
C26 C27 C28 C23 -12.0(5) . . . . ? 
C24 C23 C28 C27 4.6(4) . . . . ? 
C22 C23 C28 C27 -176.4(3) . . . . ? 
C24 C23 C28 N6 -173.9(3) . . . . ? 
C22 C23 C28 N6 5.2(4) . . . . ? 
C22 C21 C29 N6 4.8(5) . . . . ? 
C20 C21 C29 N6 178.9(3) . . . . ? 
N6 C30 C31 C32 -107.8(3) . . . . ? 
N6 C30 C32 C31 107.8(4) . . . . ? 
C34A C33 C34 N8 -63(2) . . . . ? 
N7 C33 C34 N8 50.0(5) . . . . ? 
C34A C33 C34 C37 57(2) . . . . ? 
N7 C33 C34 C37 169.9(3) . . . . ? 
N7 C33 C34A C37 -151.2(18) . . . . ? 
C34 C33 C34A C37 -64(3) . . . . ? 
N7 C33 C34A N8 -27(4) . . . . ? 
C34 C33 C34A N8 60(3) . . . . ? 
N8 C35A C36 N7 25(4) . . . . ? 
C38 C35A C36 N7 141.7(13) . . . . ? 
N8 C35A C36 C35 -62(3) . . . . ? 
C38 C35A C36 C35 55(2) . . . . ? 
N8 C35 C36 C35A 51(2) . . . . ? 
C38 C35 C36 C35A -68(2) . . . . ? 
N8 C35 C36 N7 -62.3(5) . . . . ? 
C38 C35 C36 N7 178.5(4) . . . . ? 
N8 C34 C37 C34A 73(2) . . . . ? 
C33 C34 C37 C34A -48(2) . . . . ? 
C33 C34A C37 C34 71(3) . . . . ? 
N8 C34A C37 C34 -59.4(19) . . . . ? 
C36 C35 C38 C35A 55(2) . . . . ? 
N8 C35 C38 C35A -63(2) . . . . ? 
C36 C35A C38 C35 -64(2) . . . . ? 
N8 C35A C38 C35 63(2) . . . . ? 
C21 C29 N6 C28 3.6(5) . . . . ? 
C21 C29 N6 C30 -164.2(3) . . . . ? 
C27 C28 N6 C29 173.0(3) . . . . ? 
C23 C28 N6 C29 -8.5(4) . . . . ? 
C27 C28 N6 C30 -19.5(5) . . . . ? 
C23 C28 N6 C30 159.0(3) . . . . ? 
C31 C30 N6 C29 110.9(4) . . . . ? 
C32 C30 N6 C29 42.2(4) . . . . ? 
C31 C30 N6 C28 -56.7(4) . . . . ? 
C32 C30 N6 C28 -125.4(3) . . . . ? 
C25 C26 N7 C33 8.4(5) . . . . ? 
C27 C26 N7 C33 -170.0(3) . . . . ? 
C25 C26 N7 C36 -137.2(4) . . . . ? 
C27 C26 N7 C36 44.4(5) . . . . ? 
C34A C33 N7 C26 -155(2) . . . . ? 
C34 C33 N7 C26 164.4(3) . . . . ? 
C34A C33 N7 C36 -7(2) . . . . ? 
C34 C33 N7 C36 -48.1(4) . . . . ? 
C35A C36 N7 C26 159(2) . . . . ? 
C35 C36 N7 C26 -156.5(3) . . . . ? 
C35A C36 N7 C33 10(2) . . . . ? 
C35 C36 N7 C33 54.7(4) . . . . ? 
C36 C35A N8 C34 -22(4) . . . . ? 
C38 C35A N8 C34 -142.5(11) . . . . ? 
C36 C35A N8 C35 65(3) . . . . ? 
C38 C35A N8 C35 -55.9(18) . . . . ? 
C36 C35A N8 C34A -53(4) . . . . ? 
C38 C35A N8 C34A -173.9(19) . . . . ? 
C33 C34 N8 C35A -15(2) . . . . ? 
C37 C34 N8 C35A -136(2) . . . . ? 
C33 C34 N8 C35 -57.5(5) . . . . ? 
C37 C34 N8 C35 -177.9(3) . . . . ? 
C33 C34 N8 C34A 51(2) . . . . ? 
C37 C34 N8 C34A -70(2) . . . . ? 
C36 C35 N8 C35A -48(2) . . . . ? 
C38 C35 N8 C35A 74(2) . . . . ? 
C36 C35 N8 C34 63.5(5) . . . . ? 
C38 C35 N8 C34 -175.3(3) . . . . ? 
C36 C35 N8 C34A 27.1(18) . . . . ? 
C38 C35 N8 C34A 148.3(17) . . . . ? 
C33 C34A N8 C35A 55(4) . . . . ? 
C37 C34A N8 C35A -172(2) . . . . ? 
C33 C34A N8 C34 -71(3) . . . . ? 
C37 C34A N8 C34 63(2) . . . . ? 
C33 C34A N8 C35 16(4) . . . . ? 
C37 C34A N8 C35 149.2(13) . . . . ? 
O5 C20 O4 Cd1 26.7(4) . . . . ? 
C21 C20 O4 Cd1 -154.5(2) . . . . ? 
O1 Cd1 O4 C20 133.9(2) 2_766 . . . ? 
O5 Cd1 O4 C20 31.2(2) 2_666 . . . ? 
O2 Cd1 O4 C20 -128.3(2) . . . . ? 
O6 Cd1 O4 C20 13.8(4) 2_666 . . . ? 
O3 Cd1 O4 C20 -55.2(2) . . . . ? 
O4 C20 O5 Cd1 -130.7(3) . . . 2_666 ? 
C21 C20 O5 Cd1 50.6(3) . . . 2_666 ? 
C21 C22 O6 Cd1 -30.3(4) . . . 2_666 ? 
C23 C22 O6 Cd1 148.5(2) . . . 2_666 ? 
 
loop_ 
 _geom_hbond_atom_site_label_D 
 _geom_hbond_atom_site_label_H 
 _geom_hbond_atom_site_label_A 
 _geom_hbond_distance_DH 
 _geom_hbond_distance_HA 
 _geom_hbond_distance_DA 
 _geom_hbond_angle_DHA 
 _geom_hbond_site_symmetry_A 

N1 H1A O1  0.86 2.33 3.021(3) 138 1_455
N1 H1B O3  0.86 1.96 2.598(3) 130 . 
N1 H1B O5  0.86 2.35 3.061(3) 141 . 
N5 H5A O4  0.86 2.59 3.221(3) 131 1_455 
N5 H5B O6  0.86 1.98 2.609(3) 129 . 
 
_diffrn_measured_fraction_theta_max    1.000 
_diffrn_reflns_theta_full              24.99 
_diffrn_measured_fraction_theta_full   1.000 
_refine_diff_density_max    0.457 
_refine_diff_density_min   -0.579 
_refine_diff_density_rms    0.066 
